# Supplementary material for: The PERK pathway independently triggers apoptosis and a Rac1/Slpr/JNK/Dilp8 signaling favoring tissue homeostasis in a chronic ER stress Drosophila model
Source: PubMed Central journal article supplement — Cell Death Dis. 2014 Oct 9;5(10):e1452–. doi: 10.1038/cddis.2014.403 (PMC4649510; doi:10.1038/cddis.2014.403), 2014-10-09
Supplement: cddis2014403x4.pdf [file cddis2014403x4.pdf]

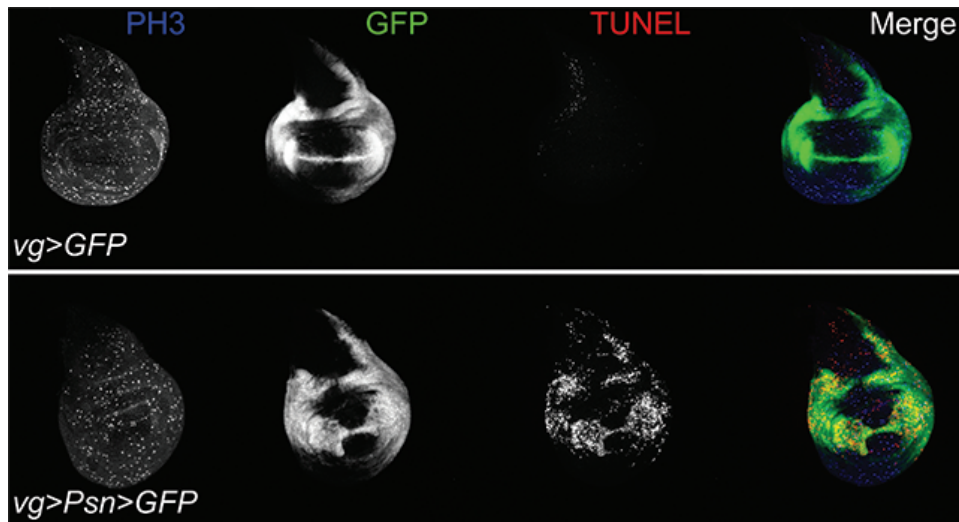

**Supplementary Figure S3:** ER stress-dependent apoptosis does not induce compensatory proliferation.

Anti-Phospho-Histone 3 (PH3) (rabbit anti-phospho-Histone H3 Ser10, Millipore, 1:1000) staining (blue) to detect mitotic cells, GFP detection (green) to visualize the *vg* expression domain, and TUNEL staining (red) to detect apoptosis in *vg-GAL4/+; UAS-EGFP/+* (top row) and *vg-GAL4, UAS-Psn, UAS-Psn/+; UAS-EGFP/+* (bottom row) third instar wing imaginal discs.
